# Supplementary material
Source: PubMed Central journal article supplement (PMC7354697)
Supplement: NIHMS1604182-supplement-Supporting_Information_document_1.pdf [file NIHMS1604182-supplement-Supporting_Information_document_1.pdf]

## Supporting Information (SI)

### Simple Structural Modifications Converting a *Bona fide* MDM2 PROTAC Degradator into a Molecular Glue Molecule: A Cautionary Tale in the Design of PROTAC Degraders

Jiuling Yang,<sup>†,‡,||,⊥</sup> Yangbing Li,<sup>‡,§,||,⊥</sup> Angelo Aguilar,<sup>‡,||,⊥</sup> Zhaomin Liu,<sup>‡,||</sup> Chao-Yie Yang,<sup>‡,||</sup> and Shaomeng Wang\*,<sup>†,‡,§,||</sup>

<sup>†</sup>Department of Pharmacology, <sup>‡</sup>Department of Internal Medicine, <sup>§</sup>Department of Medicinal Chemistry, and <sup>||</sup>Rogel Cancer Center, University of Michigan, Ann Arbor, Michigan 48109, United States.

## Contents of Supporting Information:

**Figure S1.** Cell growth inhibitory activity of the MDM2 inhibitors, the *bona fide* MDM2 degrader, MD-222 and the new putative MDM2 degrader MG-277 in p53 wild-type and p53 mutated/deleted cell lines.

**Figure S2.** The potency of different lenalidomide conjugated analogues of MG-277 in cell growth inhibition and GSPT1 degradation.

**Figure S3.** Determination of the half maximal degradation concentration ( $DC_{50}$ ) of GSPT1 degradation by the different analogues of MG-277 in RS4;11 cell line at 24 h treatment

**Table S1.** Correlation between GSPT1 degradation  $DC_{50}$  of the compounds in RS4;11 cells and  $IC_{50}$  in growth inhibition in RS4;11 and IRMI-2 cell lines.

**Figure S4.** Detailed illustration of the predicted binding mode of MG-277 (yellow) to the cereblon (orange) – GSPT1 (blue) complex.

**Figure S5.** NMR spectra of MG-277

**Figure S6.** Mass spectrum and purity spectrum of MG-277.

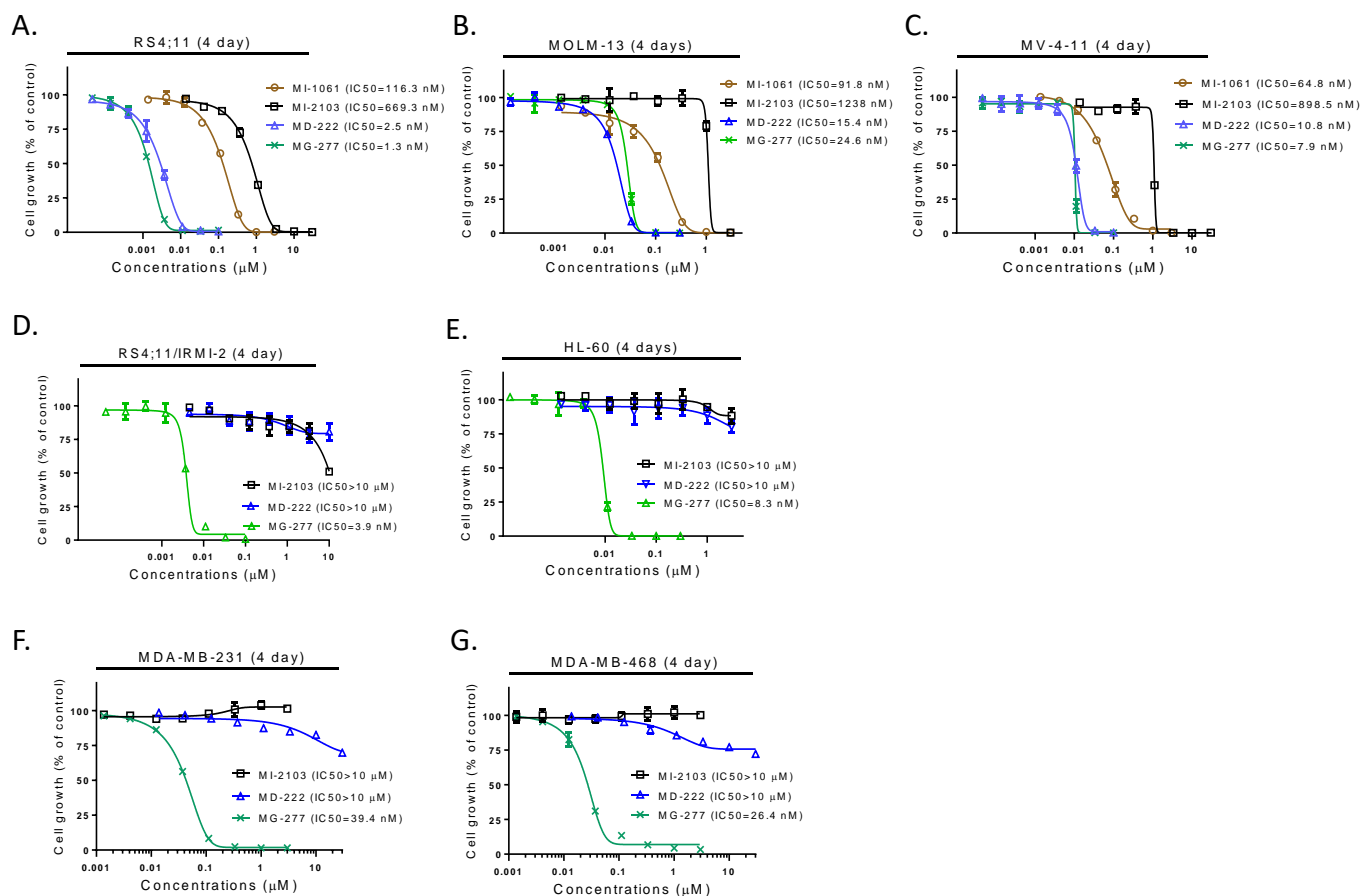

**Figure S1. The cell growth inhibitory activity of MG-277 is p53-independent.** (A-C) Cell growth inhibitory activity of the *bona fide* MDM2 degrader, MD-222, the new putative MDM2 degrader MG-277, and MDM2 inhibitors, MI-1061 and MI-2103, in three p53 wild-type leukemia cell lines, RS4;11, MV-4-11 and MOLM-13. (D-G) Cell growth inhibitory activity of MD-222, MG-277, and MDM2 inhibitor, MI-2103 in a p53 mutant cell line, RS4;11/IRMI-2 (D), a leukemia cell line with deleted p53, HL-60 (E), and two p53 mutant breast cancer cell lines, MDA-MB-231 (F) and MDA-MB-468 (G). Each cell line was treated with the indicated compounds at increasing concentrations for 4 days and then cell growth inhibition was determined by a 4-day cell viability/WST assay.

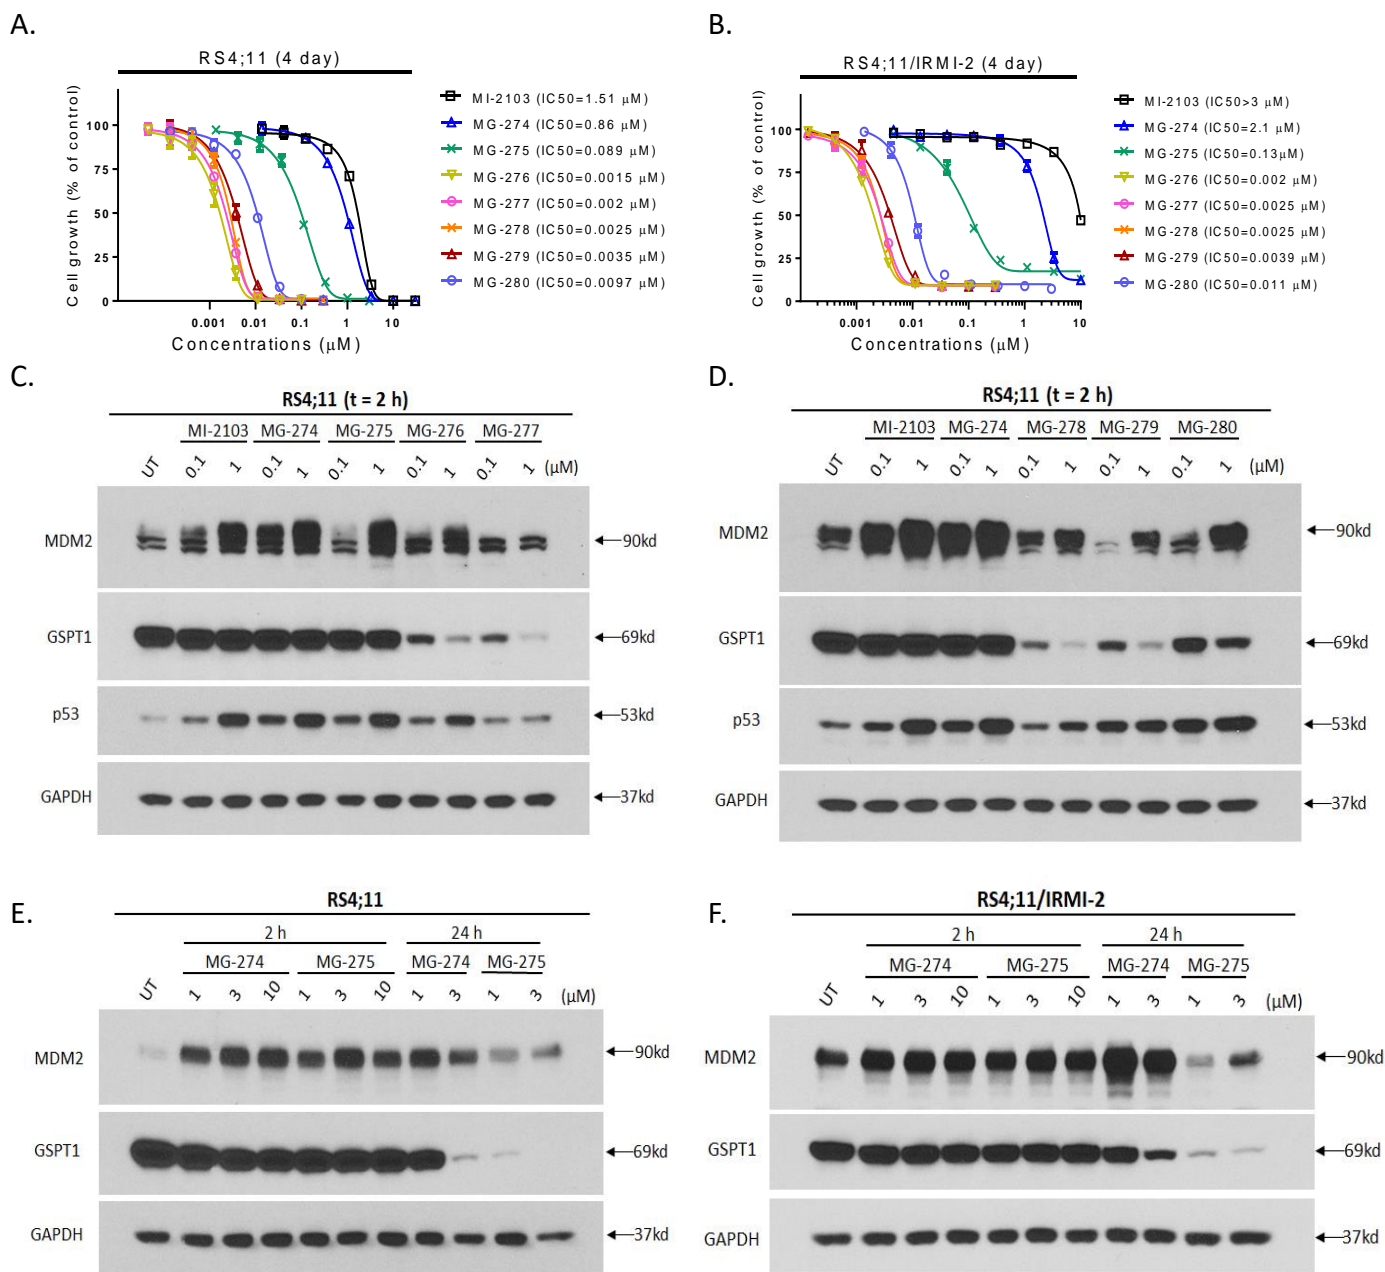

**Figure S2. Different analogues of MG-277 inhibit cell growth and degrade GSPT1.** (A-B) Cell growth inhibitory activity of the new putative MDM2 degraders by a 4-day cell viability assay in RS4;11 and IRMI-2 cells. (C-D) Western blotting for MDM2, GSPT1 and p53 protein levels after treatment with the new series of putative MDM2 degraders for 2 h in RS4;11 cells. (E-F) Western blotting of MDM2 and GSPT1 protein levels after treatment with MG-274 and MG-275 for 2h or 24 h in RS4;11 (E) and IRMI-2 (F) cells.

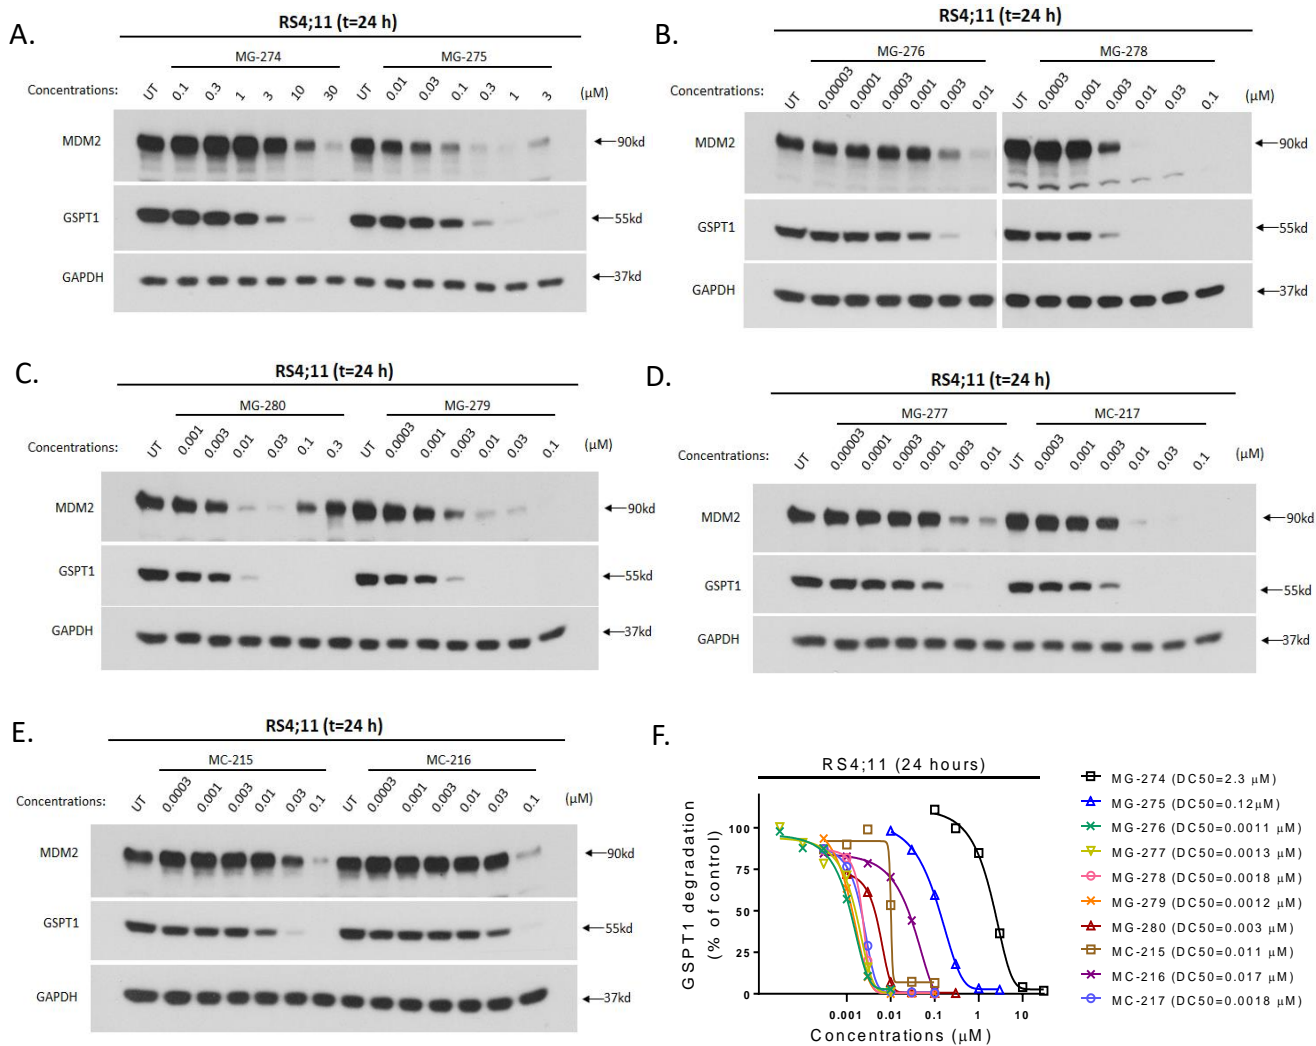

**Figure S3. Potency in GSPT1 degradation by the different analogues of MG-277 in RS4;11 cell line.** (A-E) Western blotting for MDM2 and GSPT1 protein levels after 24 h treatment with the indicated phthalimide conjugate degraders in RS4;11 cell line. (F) GSPT1 protein levels were quantified by using an imager and were normalized over the GAPDH loading control. The half maximal degradation concentration (DC<sub>50</sub>) of GSPT1 was then calculated.

**Table S1.**

Correlation between the GSPT1 degradation DC<sub>50</sub> of the compounds in RS4;11 cells and the corresponding IC<sub>50</sub> in RS4;11 cell line and p53 mutant RS4;11/IRMI-2 cell line.

| Compound No. | Linker                                                                                                                               | IC <sub>50</sub> (μM)<br>in cell growth inhibition |                | DC <sub>50</sub> (μM)<br>of GSPT1 degradation |
|--------------|--------------------------------------------------------------------------------------------------------------------------------------|----------------------------------------------------|----------------|-----------------------------------------------|
|              |                                                                                                                                      | RS4;11                                             | IRMI-2         | RS4;11                                        |
|              |                                                                                                                                      |                                                    |                |                                               |
|              | 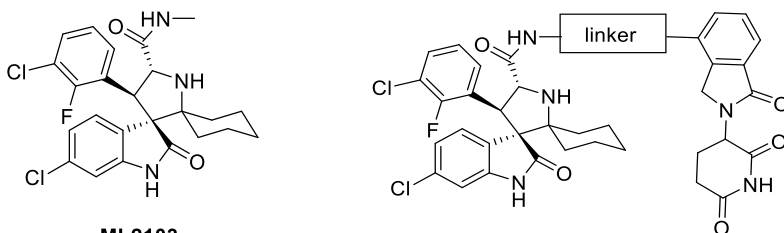 <p style="text-align: center;"><b>MI-2103</b></p> |                                                    |                |                                               |
| MG-274       | No linker                                                                                                                            | 0.76±0.096                                         | 2.58±0.45      | 2.3                                           |
| MG-275       |                                                    | 0.13±0.039                                         | 0.18±0.045     | 0.12                                          |
| MG-276       |                                                   | 0.0025±0.00091                                     | 0.0026±0.00052 | 0.0011                                        |
| MG-277       |                                                   | 0.0035±0.0013                                      | 0.0034±0.00069 | 0.0013                                        |
| MG-278       |                                                   | 0.0036±0.00091                                     | 0.0035±0.00085 | 0.0018                                        |
| MG-279       |                                                   | 0.0049±0.0012                                      | 0.0049±0.00078 | 0.0012                                        |
| MG-280       |                                                   | 0.014±0.0037                                       | 0.014±0.0026   | 0.003                                         |

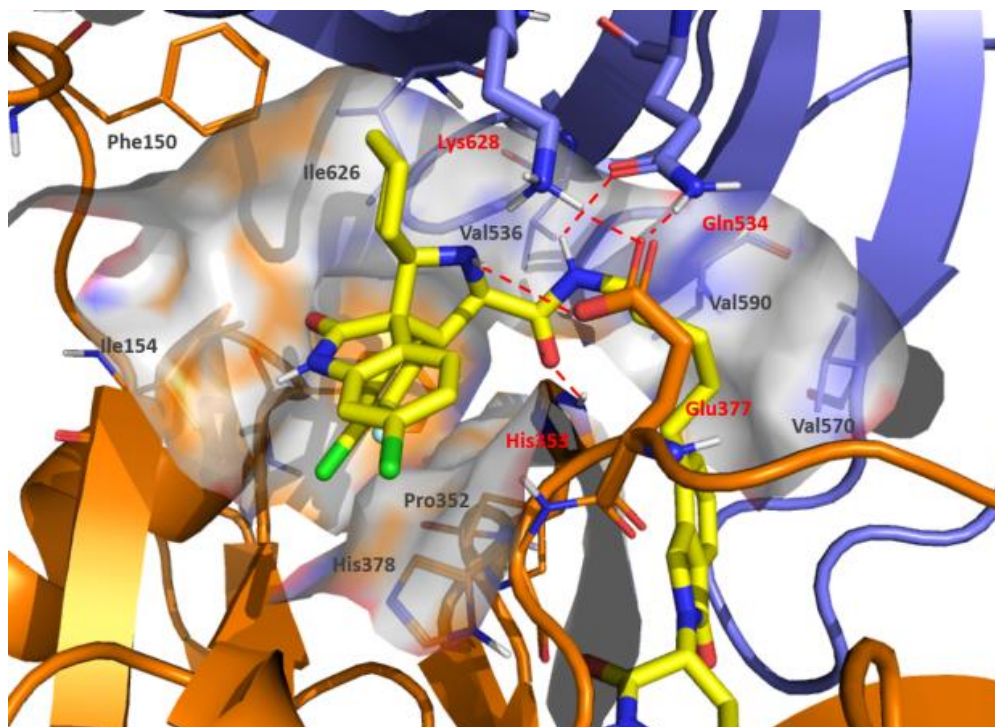

**Figure S4. Detailed illustration of the predicted binding mode of MG-277 (yellow) to the cereblon (orange) – GSPT1 (blue) complex.** Residues in both proteins involved in hydrophobic packing are labeled with dark grey and shown with surface; residues participated in hydrogen bonding are labeled in red. Interactions between lenalidomide and cereblon are the same as in the crystal structure, and are not shown in this figure.

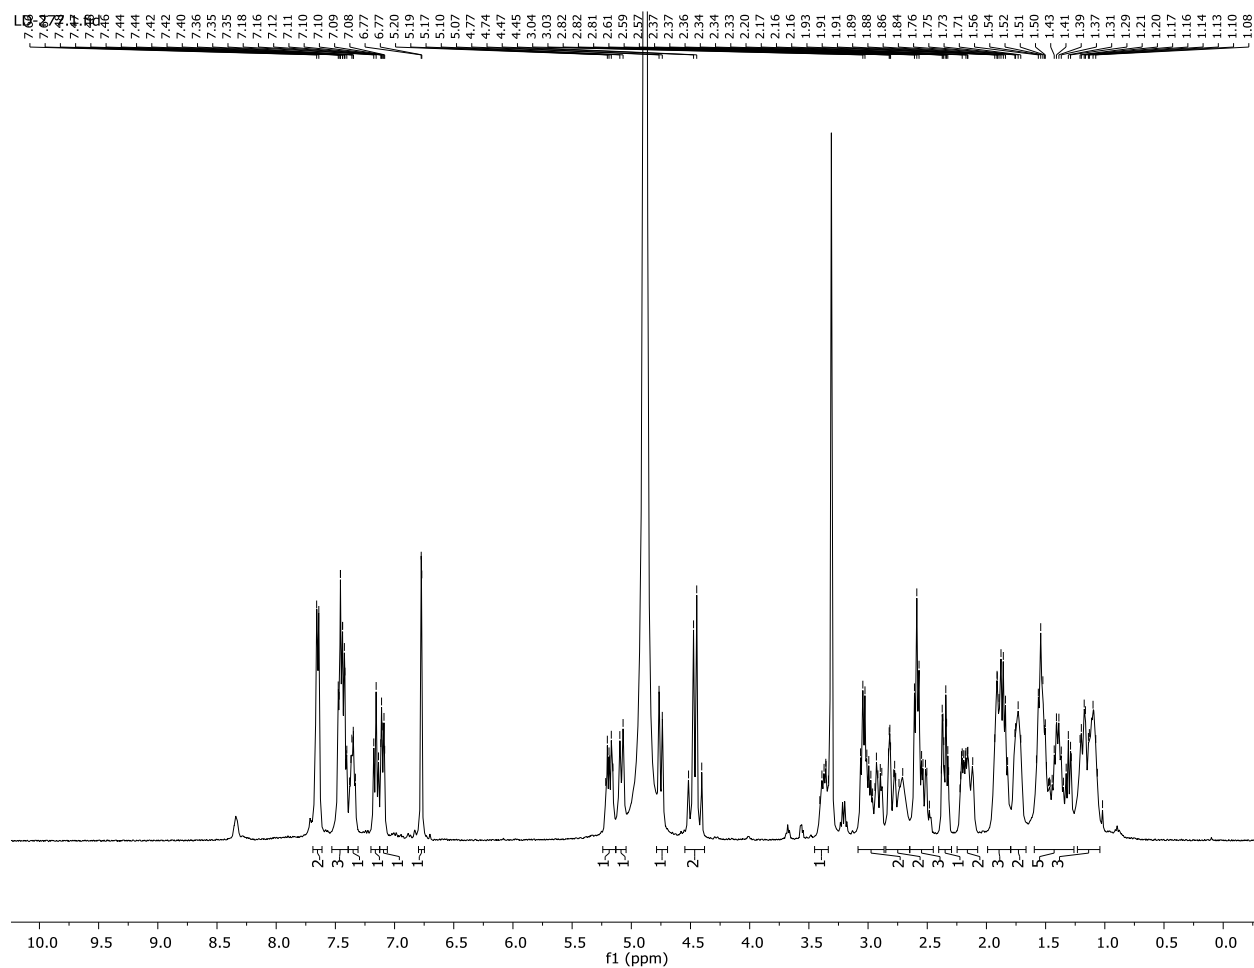

**Figure S5. NMR Spectra of MG-277;**  $^1\text{H}$  NMR (400 MHz, Methanol- $d_4$ )  $\delta$  7.65 (d,  $J = 7.3$  Hz, 2H), 7.53 – 7.38 (m, 3H), 7.40 – 7.31 (m, 1H), 7.16 (t,  $J = 8.0$  Hz, 1H), 7.10 (dt,  $J = 8.2, 2.4$  Hz, 1H), 6.77 (d,  $J = 2.0$  Hz, 1H), 5.19 (dt,  $J = 13.3, 5.5$  Hz, 1H), 5.08 (d,  $J = 11.0$  Hz, 1H), 4.75 (d,  $J = 11.0$  Hz, 1H), 4.55 – 4.38 (m, 2H), 3.45 – 3.33 (m, 1H), 3.08 – 2.86 (m, 2H), 2.85 – 2.65 (m, 2H), 2.65 – 2.45 (m, 3H), 2.40 – 2.30 (m, 1H), 2.25 – 2.07 (m, 2H), 1.99 – 1.80 (m, 3H), 1.79 – 1.67 (m, 2H), 1.60 – 1.26 (m, 5H), 1.23 – 1.04 (m, 3H).



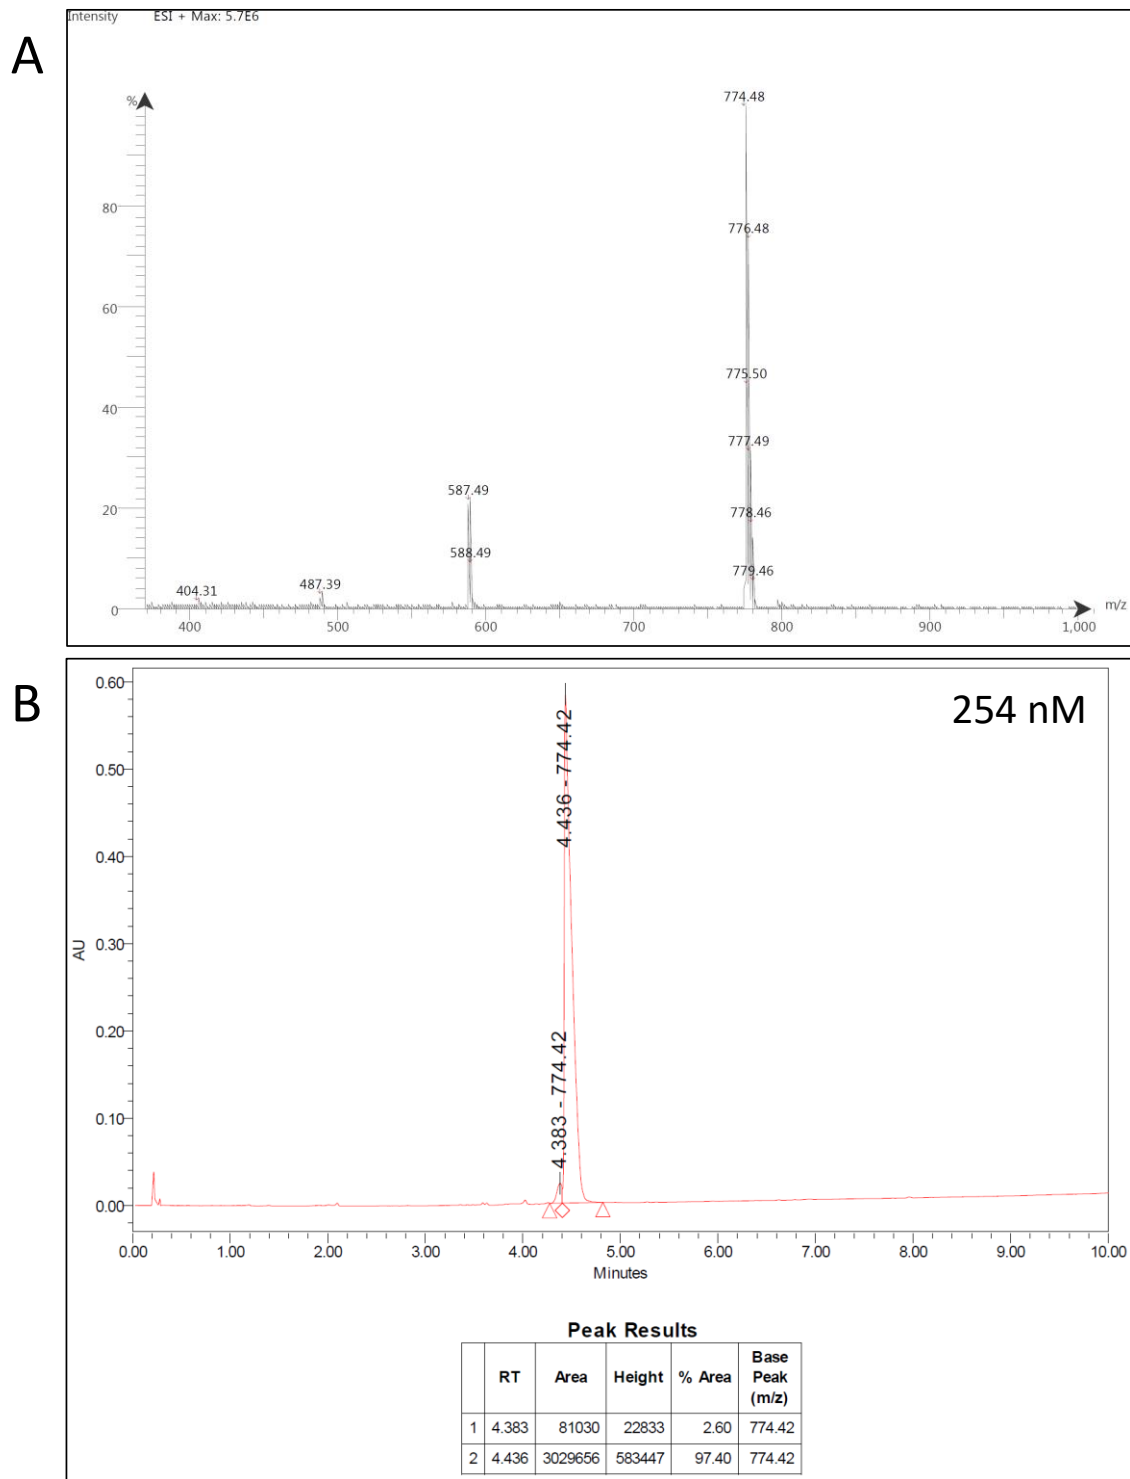

**Figure S6. (A.)** Mass Spectrum of MG-277 LC-MS (ESI)  $m/z$   $(M + H)^+$  calcd for  $C_{41}H_{43}Cl_2FN_5O_5^+ = 774.26$ ; Found 774.42; **(B.)** UPLC spectra at 254 nm showing purity >95%
